# Supplementary material for: Effect of an alkyl substituent and spacer length in benzene-centered tripodal diglycolamides on the sequestration of minor actinides
Source: Royal Society of Chemistry journal article supplement (doi:10.1039/c8dt02750a), 2018-01-01
Supplement: c8dt02750a1.pdf [file c8dt02750a1.pdf]

## Effect of alkyl substituent and spacer length in benzene-centered tripodal diglycolamides on the sequestration of minor actinides

Seraj Ahmad Ansari,<sup>a</sup> Andrea Leoncini,<sup>b</sup> Prasanta Kumar Mohapatra<sup>a,\*</sup>,  
Jurrian Huskens<sup>b</sup> and Willem Verboom<sup>b,\*</sup>

<sup>a</sup>Radiochemistry Division, Bhabha Atomic Research Centre, Mumbai – 400 085, INDIA

<sup>b</sup>Molecular Nanofabrication group, MESA+ Institute for Nanotechnology,  
University of Twente, P.O. Box 217, 7500 AE Enschede, The Netherlands

E-mail: [mpatra@barc.gov.in](mailto:mpatra@barc.gov.in); [w.verboom@utwente.nl](mailto:w.verboom@utwente.nl)

### Electronic Supporting Information

#### Contents

| Topic                                                                | Page |
|----------------------------------------------------------------------|------|
| S1. Purification of <sup>241</sup> Am                                | 2    |
| S2. Radiometric assay of <sup>241</sup> Am and <sup>152,154</sup> Eu | 2    |
| S3. Solvent extraction studies                                       | 2    |

### S1. Purification of $^{241}\text{Am}$

$^{241}\text{Am}$ , which contained  $^{237}\text{Np}$  as its daughter product, was purified by first reducing Np to its +4 state using hydroxylamine hydrochloride at 1 M  $\text{HNO}_3$  and subsequently extracting the converted  $\text{Np}^{4+}$  by a 0.5 M TTA (2-thenoyltrifluoroacetone) solution in xylene (Merck). After two successive extractions of the same aqueous phase (containing  $^{241}\text{Am}$  and  $^{237}\text{Np}$ ) with fresh TTA solutions taken each time, the aqueous phase was shaken with two lots of xylene (to extract the dissolved TTA in the aqueous phase) and subsequently evaporated to dryness; a few drops of a mixture of concentrated  $\text{HNO}_3$  and  $\text{HClO}_4$  (5:1 ratio) were added to destroy the organic impurities, if any. Alpha spectrometry of the purified  $^{241}\text{Am}$  stock was carried out to rule out the presence of impurities.

### S2. Radiometric assay of $^{241}\text{Am}$ and $^{152,154}\text{Eu}$

$^{241}\text{Am}$  and  $^{152,154}\text{Eu}$  were assayed radiometrically using a well type  $\text{NaI(Tl)}$  scintillation counter (Para Electronics) which was interfaced with a multi-channel analyzer (ECIL, India). For experiments where the extraction of Am or Eu were very large or very low, the aliquot size from the phase containing low counts was kept large enough to have more counts. Additionally, the counting time was increased (in some cases >10 h counting time was used as against only one minute for most samples). The counter was calibrated with known standards before the counting was done. Enough counts were collected (>10,000 counts) to neglect the counting statistics errors (<1%).

### S3. Solvent extraction studies

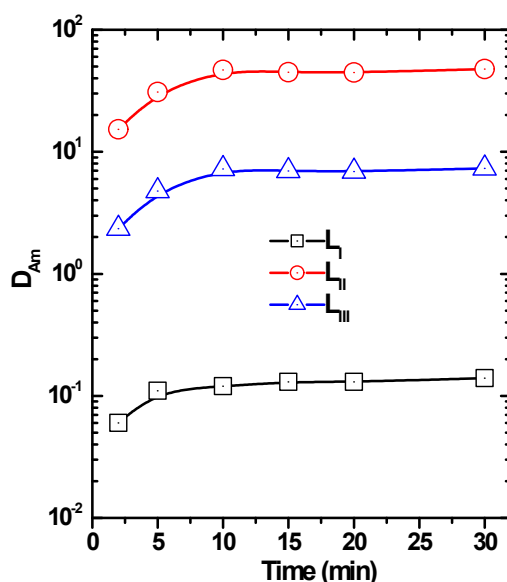

**Fig. S1** Distribution ratio of Am(III) as a function of time to establish the equilibration time. Organic phase: 1 mmol/L ligand in 5% iso-decanol / *n*-dodecane; Aqueous phase: 3 M  $\text{HNO}_3$ ; Temperature: 25 °C.

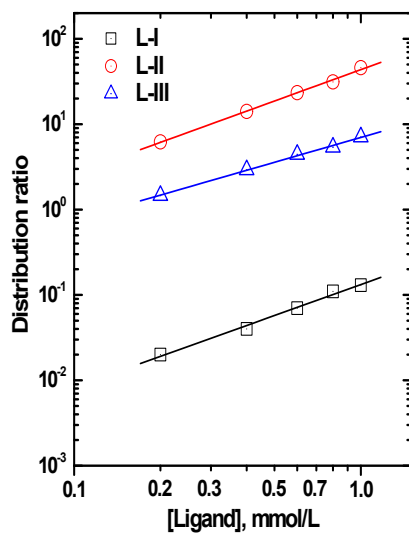

**Fig. S2** Effect of ligand concentration on the extraction of Am(III). Aqueous phase: 3 M HNO<sub>3</sub>; Temperature: 25 °C.
